# Supplementary material
Source: publisher site journal article supplement (https://www.dovepress.com/get_supplementary_file.php?f=478573.docx)
Supplement: Supplementary file 1 [file get_supplementary_file.php]

Supplementary table1. Comparison of clinical baseline for predicting upper limb lymphedema based on random partitioning training and validation samples

| Variables | Training cohort | | | P-value | Testing cohort | | | P-value |
| --- | --- | --- | --- | --- | --- | --- | --- | --- |
| Overall(N=2212) | Yes(N=291) | No(N=1921) | Overall(N=948) | Yes(N=119) | No(N=829) |
| Sex (%) |  |  |  |  |  |  |  |  |
| male | 1099 (49.7) | 155 (53.3) | 944 (49.1) | 0.212 | 503 (53.1) | 72 (60.5) | 431 (52.0) | 0.101 |
| female | 1113 (50.3) | 136 (46.7) | 977 (50.9) |  | 445 (46.9) | 47 (39.5) | 398 (48.0) |  |
| Age (median [IQR]),year | 43.00 [30.00, 56.00] | 44.00 [30.50, 56.00] | 42.00 [30.00, 56.00] | 0.169 | 43.00 [31.00, 57.00] | 42.00 [29.00, 56.00] | 44.00 [31.00, 57.00] | 0.267 |
| BMI (median [IQR]),kg/m2 | 22.30 [20.90, 23.80] | 28.20 [26.35, 30.30] | 22.00 [20.70, 23.20] | <0.001 | 22.40 [21.00, 23.80] | 28.60 [26.45, 30.10] | 22.10 [20.80, 23.30] | <0.001 |
| Diabetes (%) |  |  |  |  |  |  |  |  |
| yes | 1062 (48.0) | 149 (51.2) | 913 (47.5) | 0.268 | 456 (48.1) | 55 (46.2) | 401 (48.4) | 0.733 |
| no | 1150 (52.0) | 142 (48.8) | 1008 (52.5) |  | 492 (51.9) | 64 (53.8) | 428 (51.6) |  |
| Hypertension (%) |  |  |  |  |  |  |  |  |
| yes | 862 (39.0) | 194 (66.7) | 668 (34.8) | <0.001 | 384 (40.5) | 85 (71.4) | 299 (36.1) | <0.001 |
| no | 1350 (61.0) | 97 (33.3) | 1253 (65.2) |  | 564 (59.5) | 34 (28.6) | 530 (63.9) |  |
| TNM (%) |  |  |  |  |  |  |  |  |
| I~II | 1384 (62.6) | 110 (37.8) | 1274 (66.3) | <0.001 | 573 (60.4) | 39 (32.8) | 534 (64.4) | <0.001 |
| IIIa | 828 (37.4) | 181 (62.2) | 647 (33.7) |  | 375 (39.6) | 80 (67.2) | 295 (35.6) |  |
| Site (%) |  |  |  |  |  |  |  |  |
| unilateral | 1385 (62.6) | 104 (35.7) | 1281 (66.7) | <0.001 | 568 (59.9) | 29 (24.4) | 539 (65.0) | <0.001 |
| bilateral | 827 (37.4) | 187 (64.3) | 640 (33.3) |  | 380 (40.1) | 90 (75.6) | 290 (35.0) |  |
| Pathology (%) |  |  |  |  |  |  |  |  |
| invasive ductal carcinoma | 758 (34.3) | 99 (34.0) | 659 (34.3) | 0.862 | 336 (35.4) | 38 (31.9) | 298 (35.9) | 0.28 |
| infiltrating lobular carcinoma | 738 (33.4) | 94 (32.3) | 644 (33.5) |  | 321 (33.9) | 48 (40.3) | 273 (32.9) |  |
| others | 716 (32.4) | 98 (33.7) | 618 (32.2) |  | 291 (30.7) | 33 (27.7) | 258 (31.1) |  |
| Tumor diameter (%),cm |  |  |  |  |  |  |  |  |
| ≥2 | 1107 (50.0) | 150 (51.5) | 957 (49.8) | 0.626 | 469 (49.5) | 60 (50.4) | 409 (49.3) | 0.902 |
| ＜2 | 1105 (50.0) | 141 (48.5) | 964 (50.2) |  | 479 (50.5) | 59 (49.6) | 420 (50.7) |  |
| Differentiation (%) |  |  |  |  |  |  |  |  |
| medium to high | 756 (34.2) | 93 (32.0) | 663 (34.5) | 0.42 | 296 (31.2) | 35 (29.4) | 261 (31.5) | 0.873 |
| low | 724 (32.7) | 92 (31.6) | 632 (32.9) |  | 341 (36.0) | 45 (37.8) | 296 (35.7) |  |
| undifferentiated | 732 (33.1) | 106 (36.4) | 626 (32.6) |  | 311 (32.8) | 39 (32.8) | 272 (32.8) |  |
| Surgery (%) |  |  |  |  |  |  |  |  |
| resection | 545 (24.6) | 76 (26.1) | 469 (24.4) | 0.718 | 232 (24.5) | 26 (21.8) | 206 (24.8) | 0.056 |
| curative | 592 (26.8) | 74 (25.4) | 518 (27.0) |  | 233 (24.6) | 22 (18.5) | 211 (25.5) |  |
| extended radical | 534 (24.1) | 65 (22.3) | 469 (24.4) |  | 241 (25.4) | 29 (24.4) | 212 (25.6) |  |
| modified radical | 541 (24.5) | 76 (26.1) | 465 (24.2) |  | 242 (25.5) | 42 (35.3) | 200 (24.1) |  |
| LNMD (%) |  |  |  |  |  |  |  |  |
| I~II | 1445 (65.3) | 111 (38.1) | 1334 (69.4) | <0.001 | 601 (63.4) | 40 (33.6) | 561 (67.7) | <0.001 |
| III | 767 (34.7) | 180 (61.9) | 587 (30.6) |  | 347 (36.6) | 79 (66.4) | 268 (32.3) |  |
| NLM (median [IQR]) | 14.00 [13.00, 15.00] | 14.00 [13.00, 15.00] | 14.00 [13.00, 15.00] | 0.86 | 14.00 [13.00, 15.00] | 14.00 [13.00, 15.00] | 14.00 [13.00, 15.00] | 0.935 |
| Treatment (%) |  |  |  |  |  |  |  |  |
| yes | 896 (40.5) | 205 (70.4) | 691 (36.0) | <0.001 | 369 (38.9) | 74 (62.2) | 295 (35.6) | <0.001 |
| no | 1316 (59.5) | 86 (29.6) | 1230 (64.0) |  | 579 (61.1) | 45 (37.8) | 534 (64.4) |  |
| Nurse (%) |  |  |  |  |  |  |  |  |
| yes | 1337 (60.4) | 107 (36.8) | 1230 (64.0) | <0.001 | 587 (61.9) | 40 (33.6) | 547 (66.0) | <0.001 |
| no | 875 (39.6) | 184 (63.2) | 691 (36.0) |  | 361 (38.1) | 79 (66.4) | 282 (34.0) |  |

Abbreviations: IQR= interquartile range; BMI= Body mass index;LNMD= Level of lymph node dissection;NLM= Number of lymph nodes cleaned.

Supplementary table2. Weight value of candidate variables for predicting upper limb lymphedema based on RFM algorithm

| **Variables** | **%IncMSE** | **IncNodePurity** |
| --- | --- | --- |
| Sex | 0.684428 | 0.676875 |
| Age | -2.99844 | 3.56074 |
| BMI | 294.7369 | 305.7381 |
| Diabetes | -3.07312 | 0.558789 |
| Hypertension | 10.48137 | 6.620482 |
| TNM | 11.87809 | 4.643799 |
| Site | 10.76328 | 7.972171 |
| Pathology | -2.16472 | 0.9776 |
| Tumor_diameter | -0.34829 | 0.570932 |
| Differentiation | -1.12671 | 0.889622 |
| Surgery | -2.55528 | 1.285458 |
| LNMD | 8.582338 | 6.758799 |
| NLM | -1.11832 | 1.581076 |
| Treatment | 5.567921 | 6.103985 |
| Nurse | 6.426691 | 4.637013 |

Abbreviations: IQR= interquartile range; BMI= Body mass index;LNMD= Level of lymph node dissection;NLM= Number of lymph nodes cleaned.


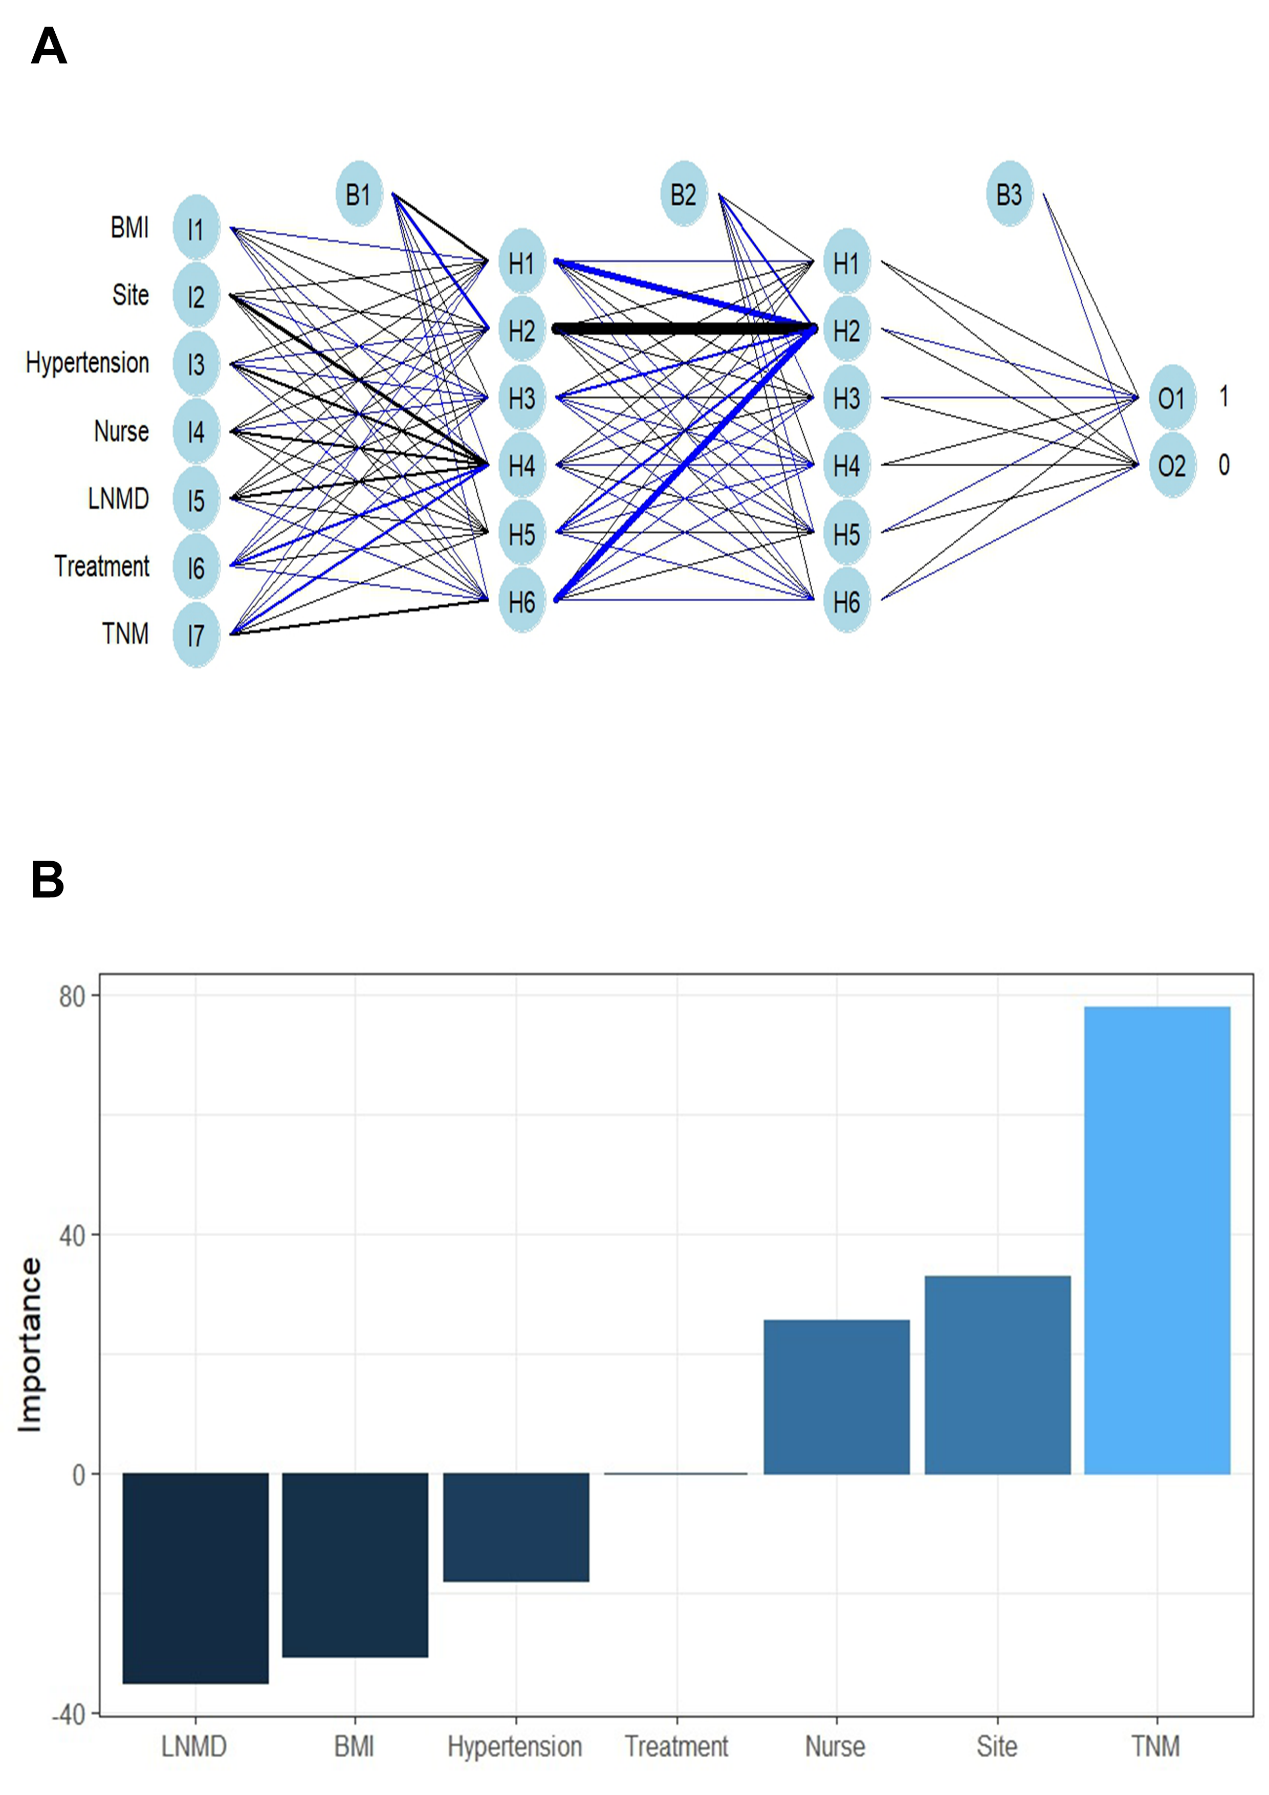


Supplementary figure1. Construction of upper limb lymphedema prediction model via ANNM. A. ANNM; B. Variable importance using connection weights. Notes. The formula of ANNM is as follows:θ=θ−η×∇ ( θ). J( θ) Among them η It's the learning rate, so（ θ). J( θ) Represents the gradient change of the loss function (i.e. J(θ)).


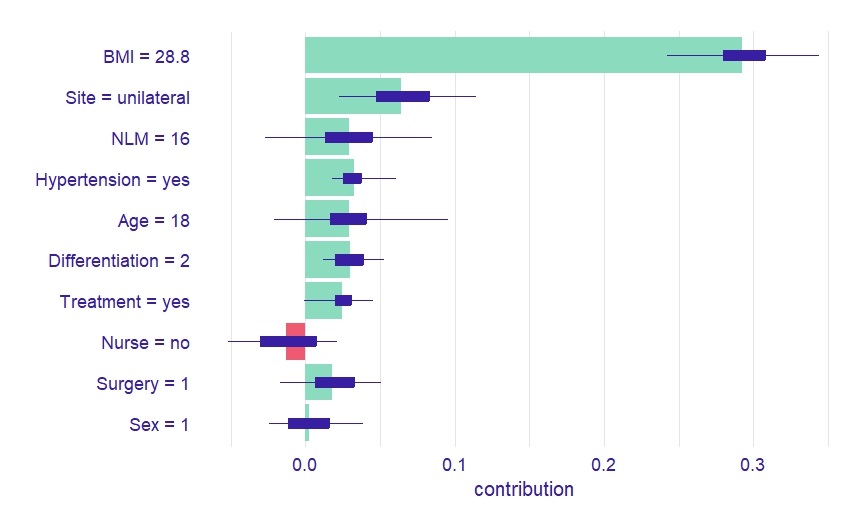


Supplementary figure2. Evaluation of the importance of random forest prediction parameters based on SHAP
